# Supplementary material for: Proposed Mechanism for the Antitrypanosomal Activity of Quercetin and Myricetin Isolated from Hypericum afrum Lam.: Phytochemistry, In Vitro Testing and Modeling Studies
Source: PubMed Central journal article supplement (PMC7918497; doi:10.3390/molecules26041009), 2021-02-14
Supplement: molecules-26-01009-s001.pdf [file molecules-26-01009-s001.pdf]

# Proposed Mechanism for the Antitrypanosomal Activity of Quercetin and Myricetin isolated from *Hypericum afrum* Lam.: Phytochemistry, in Vitro Testing and Modeling Studies

Farida Larit <sup>1,2,\*</sup>, Khaled M. Elokely <sup>3,4</sup>, Manal A. Nael <sup>3,4</sup>, Samira Benyahia <sup>5</sup>, Francisco León <sup>2,6</sup>, Stephen J. Cutler <sup>2,6</sup> and Mohammed M. Ghoneim <sup>7,8,\*</sup>

<sup>1</sup> Département de Chimie, Faculté des Sciences Exactes, Université des Frères Mentouri Constantine 1, Constantine 25000, Algeria

<sup>2</sup> Department of BioMolecular Sciences, Division of Medicinal Chemistry, University of Mississippi, University, MS 38677, USA

<sup>3</sup> Department of Pharmaceutical Chemistry, Faculty of Pharmacy, Tanta University, Tanta 31527, Egypt

<sup>4</sup> Institute for Computational Molecular Science, Department of Chemistry, Temple University, Philadelphia, PA 19122, USA; kelokely@temple.edu (K.M.E.); mnael@pharm.tanta.edu.eg (M.A.N.);

<sup>5</sup> Laboratoire de Synthèse Organique, Modélisation et Optimisation des Procèdes (LOMOP), Université Badji Mokhtar, 23000 Annaba, Algeria; samira.benyahia13@gmail.com

<sup>6</sup> Department of Drug Discovery and Biomedical Sciences, College of Pharmacy, University of South Carolina, Columbia, SC 29208, USA; jleon@mailbox.sc.edu (F.L.); sjcutler@cop.sc.edu (S.J.C.)

<sup>7</sup> Department of Pharmacy Practice, College of Pharmacy, AlMaarefa University, Ad Diriyah, Riyadh 13713, Saudi Arabia

<sup>8</sup> Department of Pharmacognosy, Faculty of Pharmacy, Al-Azhar University, Cairo, 11371, Egypt

\* Correspondence: laridafarida@umc.edu.dz (F.L.); mghoneim@mcst.edu.sa (M.M.G.), Tel.: +966-537415011 (F.L. & M.M.G.).

## Table of Content

---

|                                                              | Page      |
|--------------------------------------------------------------|-----------|
| <b>Figure S1. <sup>1</sup>H NMR spectrum of compound 1.</b>  | <b>3</b>  |
| <b>Figure S2. <sup>13</sup>C NMR spectrum of compound 1.</b> | <b>4</b>  |
| <b>Figure S3. HRESIMS (-) for compound 1.</b>                | <b>5</b>  |
| <b>Figure S4. <sup>1</sup>H NMR spectrum of compound 2.</b>  | <b>6</b>  |
| <b>Figure S5. <sup>13</sup>C NMR spectrum of compound 2</b>  | <b>7</b>  |
| <b>Figure S6. HRESIMS (-) for compound 2</b>                 | <b>8</b>  |
| <b>Figure S7. <sup>1</sup>H NMR spectrum of compound 3.</b>  | <b>9</b>  |
| <b>Figure S8. <sup>13</sup>C NMR spectrum of compound 3</b>  | <b>10</b> |
| <b>Figure S9. HRESIMS (-) for compound 3</b>                 | <b>11</b> |
| <b>Figure S10. <sup>1</sup>H NMR spectrum of compound 4.</b> | <b>12</b> |
| <b>Figure S11. <sup>13</sup>C NMR spectrum of compound 4</b> | <b>13</b> |
| <b>Figure S12. HRESIMS (-) for compound 4</b>                | <b>14</b> |
| <b>Figure S13. <sup>1</sup>H NMR spectrum of compound 5.</b> | <b>15</b> |
| <b>Figure S14. <sup>13</sup>C NMR spectrum of compound 5</b> | <b>16</b> |
| <b>Figure S15. HRESIMS (-) for compound 5</b>                | <b>17</b> |
| <b>Figure S16. <sup>1</sup>H NMR spectrum of compound 6</b>  | <b>18</b> |
| <b>Figure S17. <sup>13</sup>C NMR spectrum of compound 6</b> | <b>19</b> |
| <b>Figure S18. HRESIMS (-) for compound 6</b>                | <b>20</b> |
| <b>Figure S19. <sup>1</sup>H NMR spectrum of compound 7</b>  | <b>21</b> |
| <b>Figure S20. <sup>13</sup>C NMR spectrum of compound 7</b> | <b>22</b> |
| <b>Figure S21. HRESIMS (-) for compound 7</b>                | <b>23</b> |

---

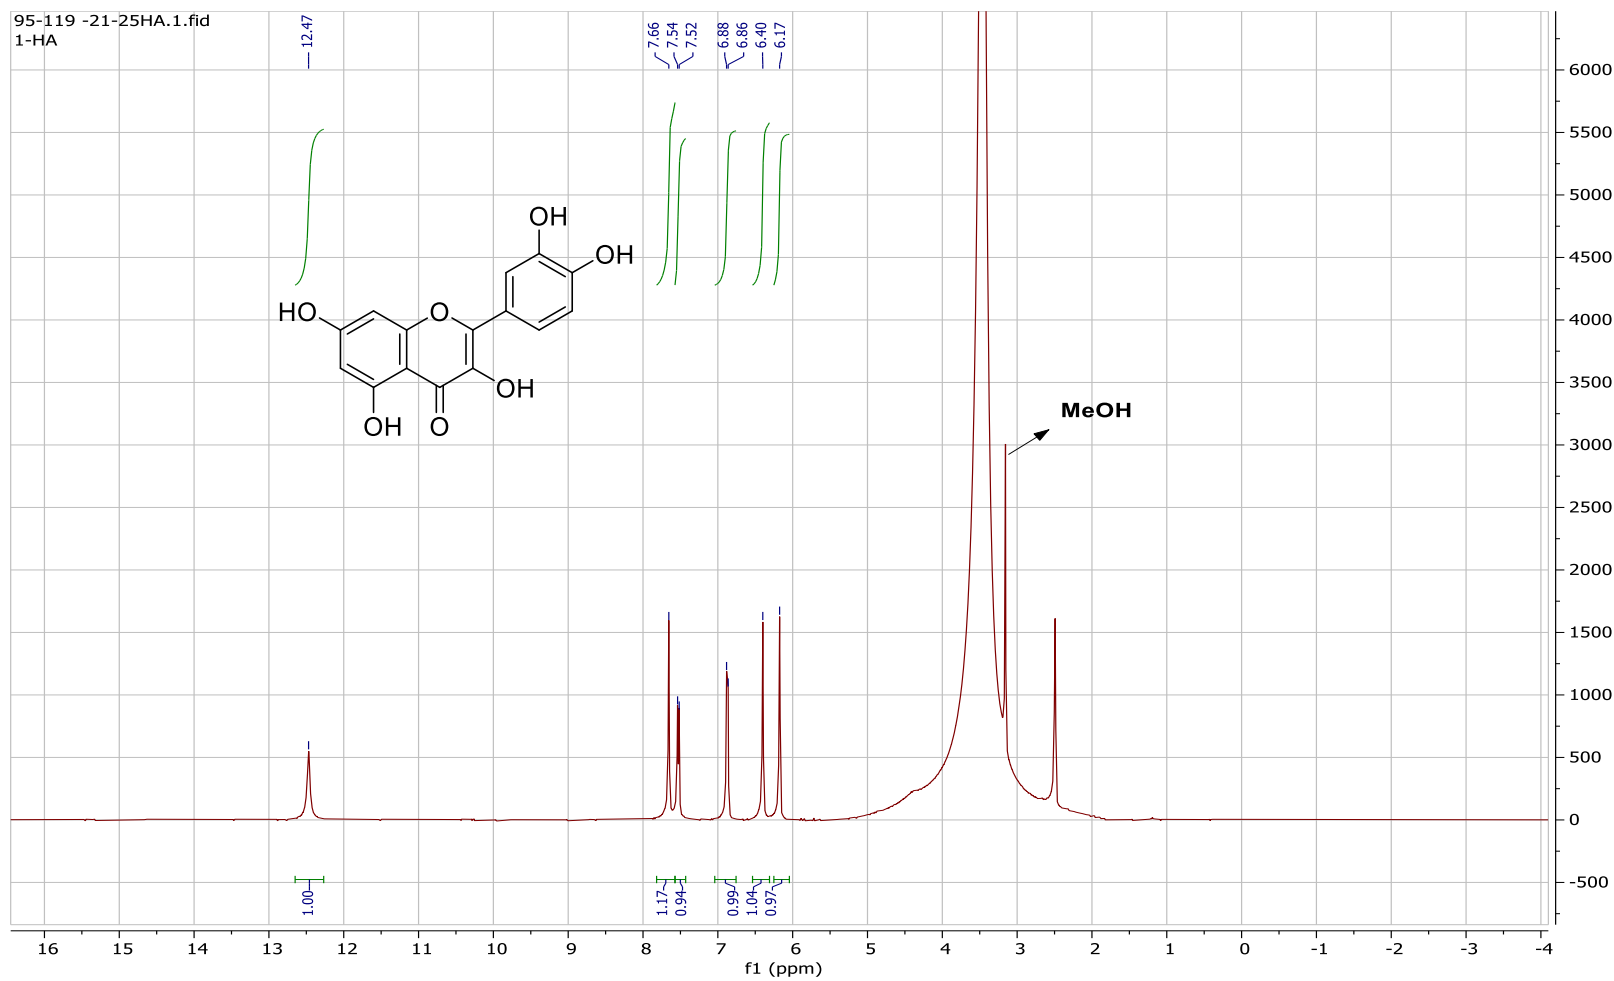

Figure S1.  $^1\text{H}$  NMR spectrum of compound 1 (DMSO- $d_6$ , 400 MHz)

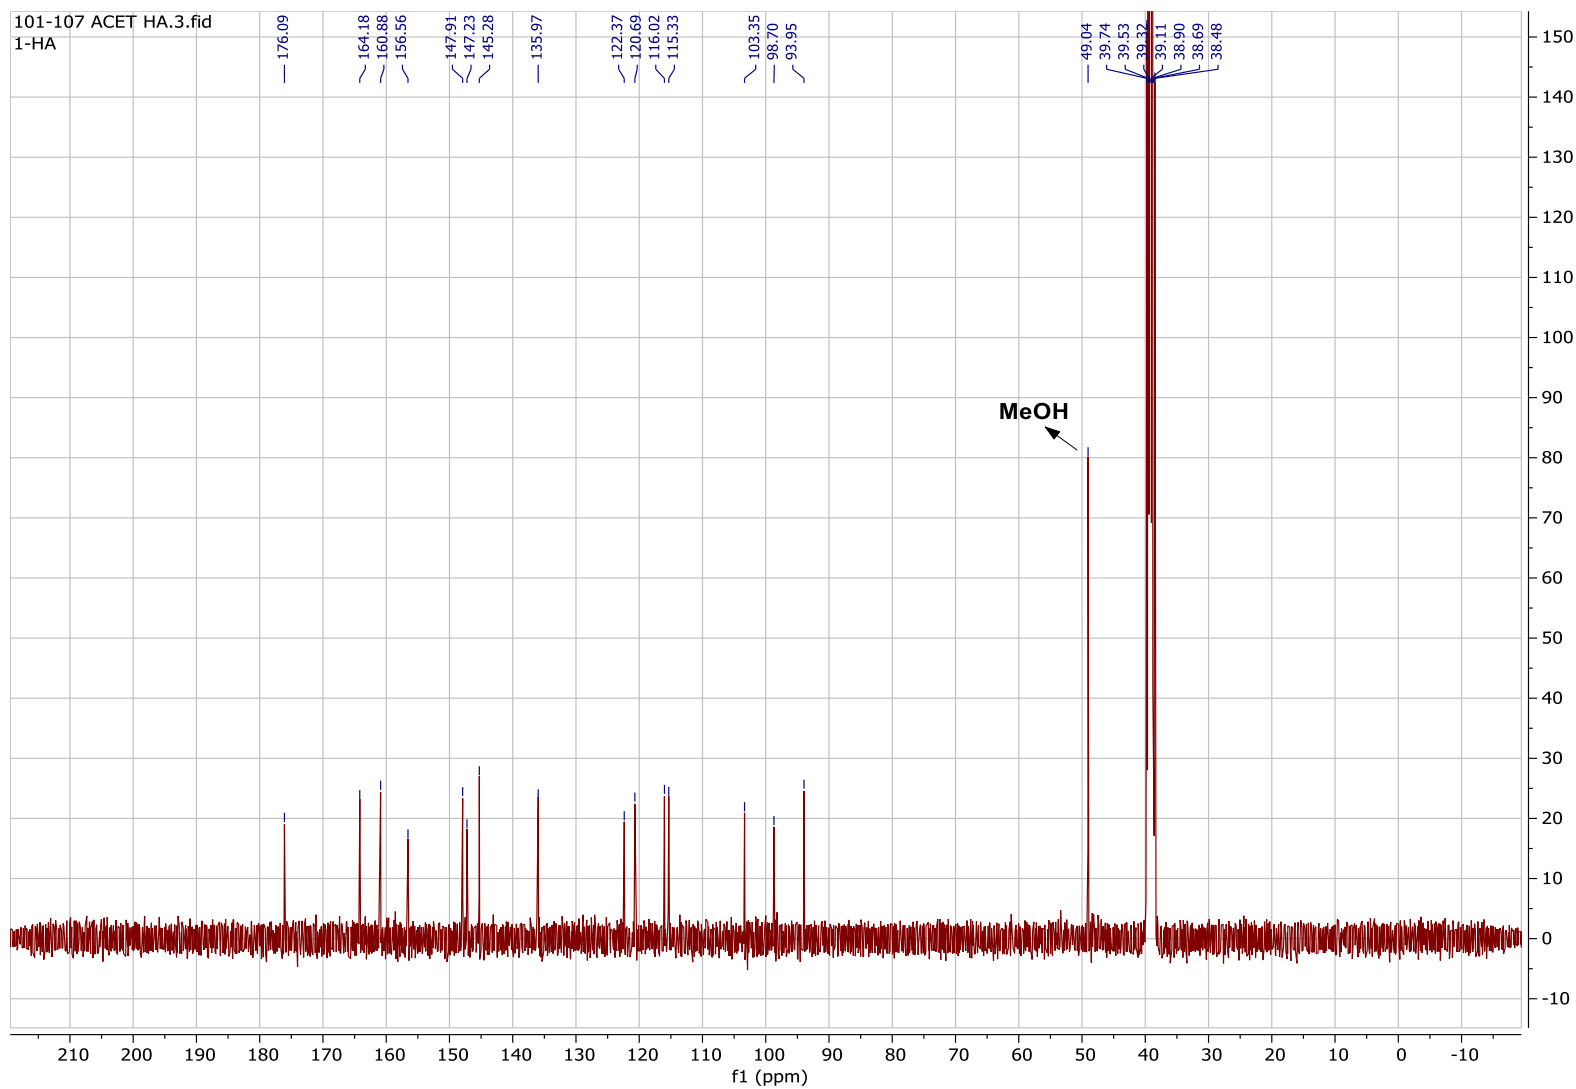

Figure S2.  $^{13}\text{C}$  NMR spectrum of compound 1 (DMSO- $d_6$ , 100 MHz)

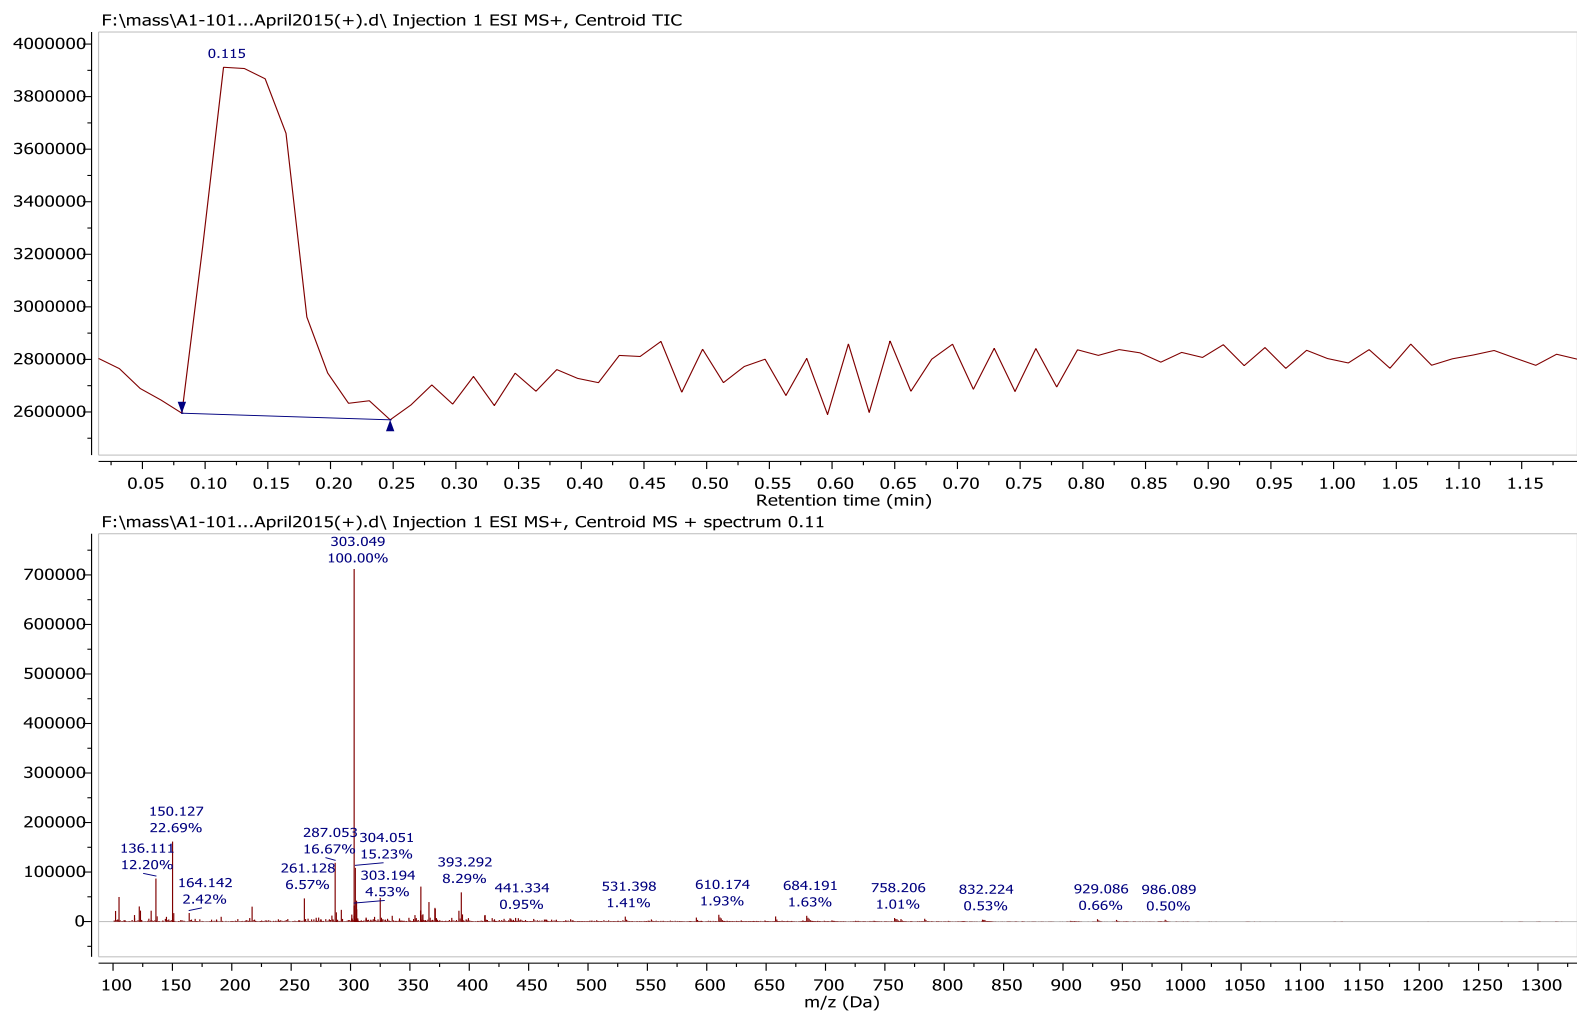

**Figure S3. Positive HRESIMS of compound 1**

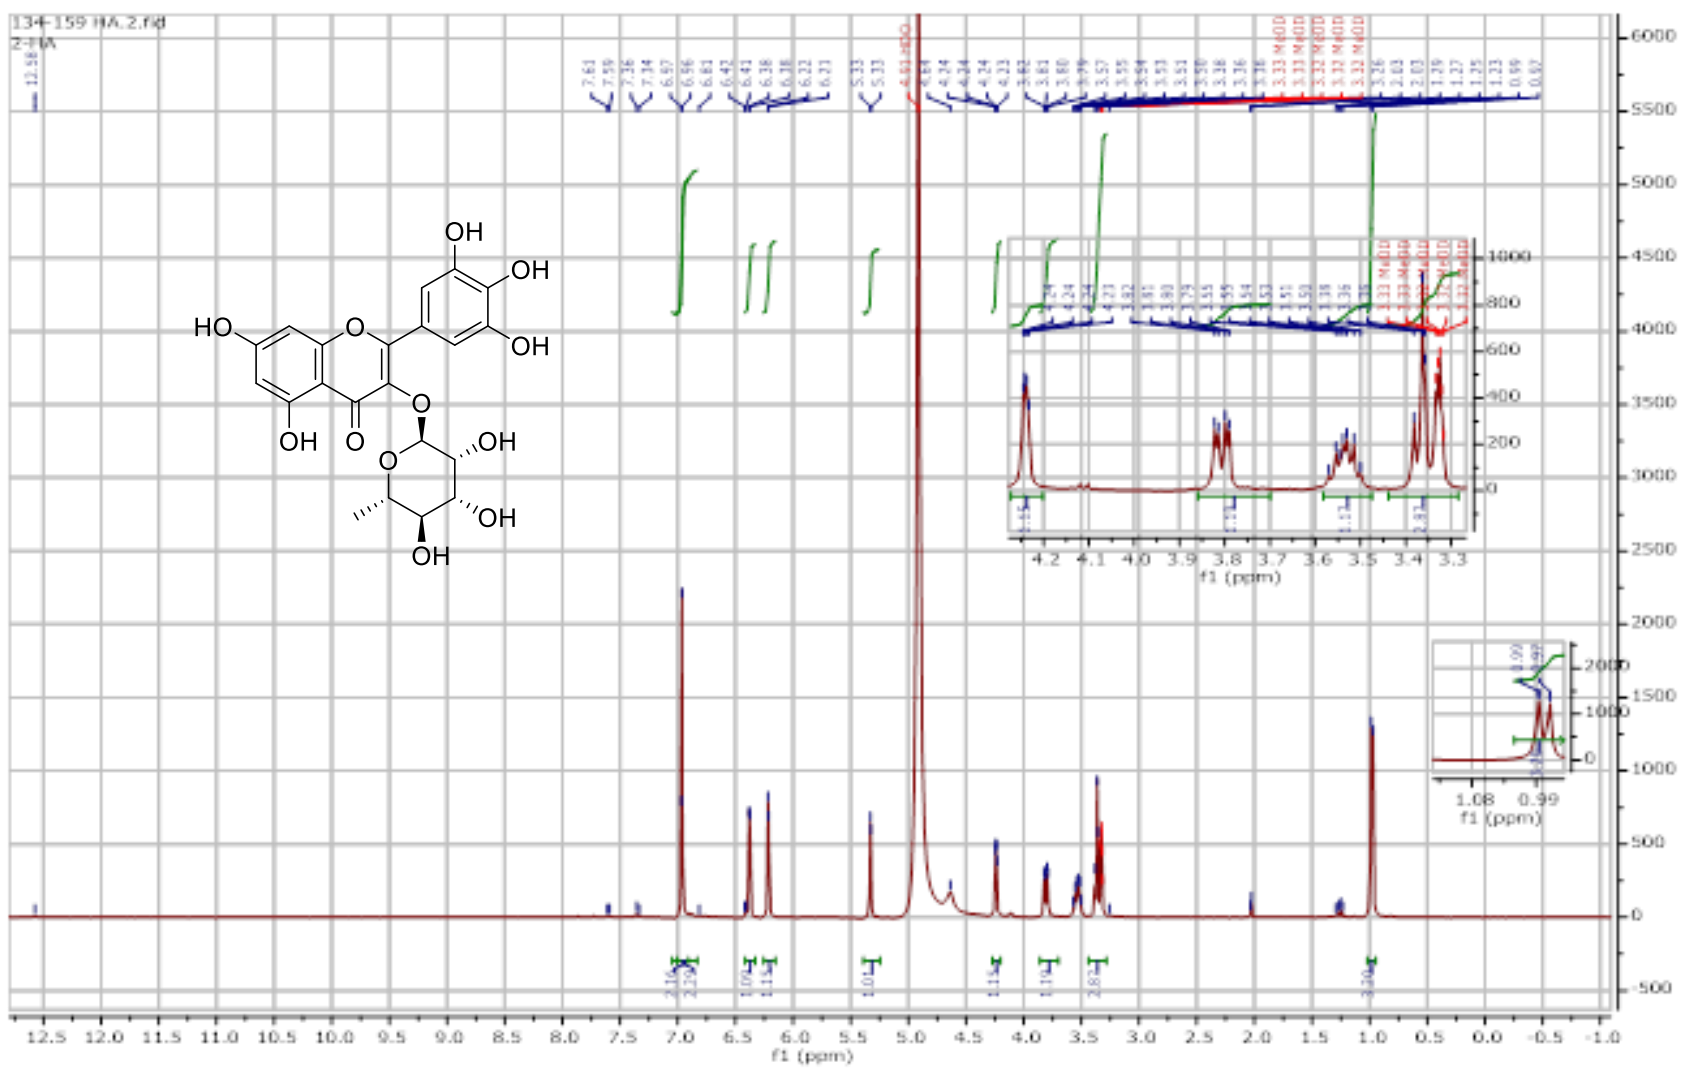

Figure S4.  $^1\text{H}$  NMR spectrum of compound 2 (Methanol- $d_4$ , 400 MHz)

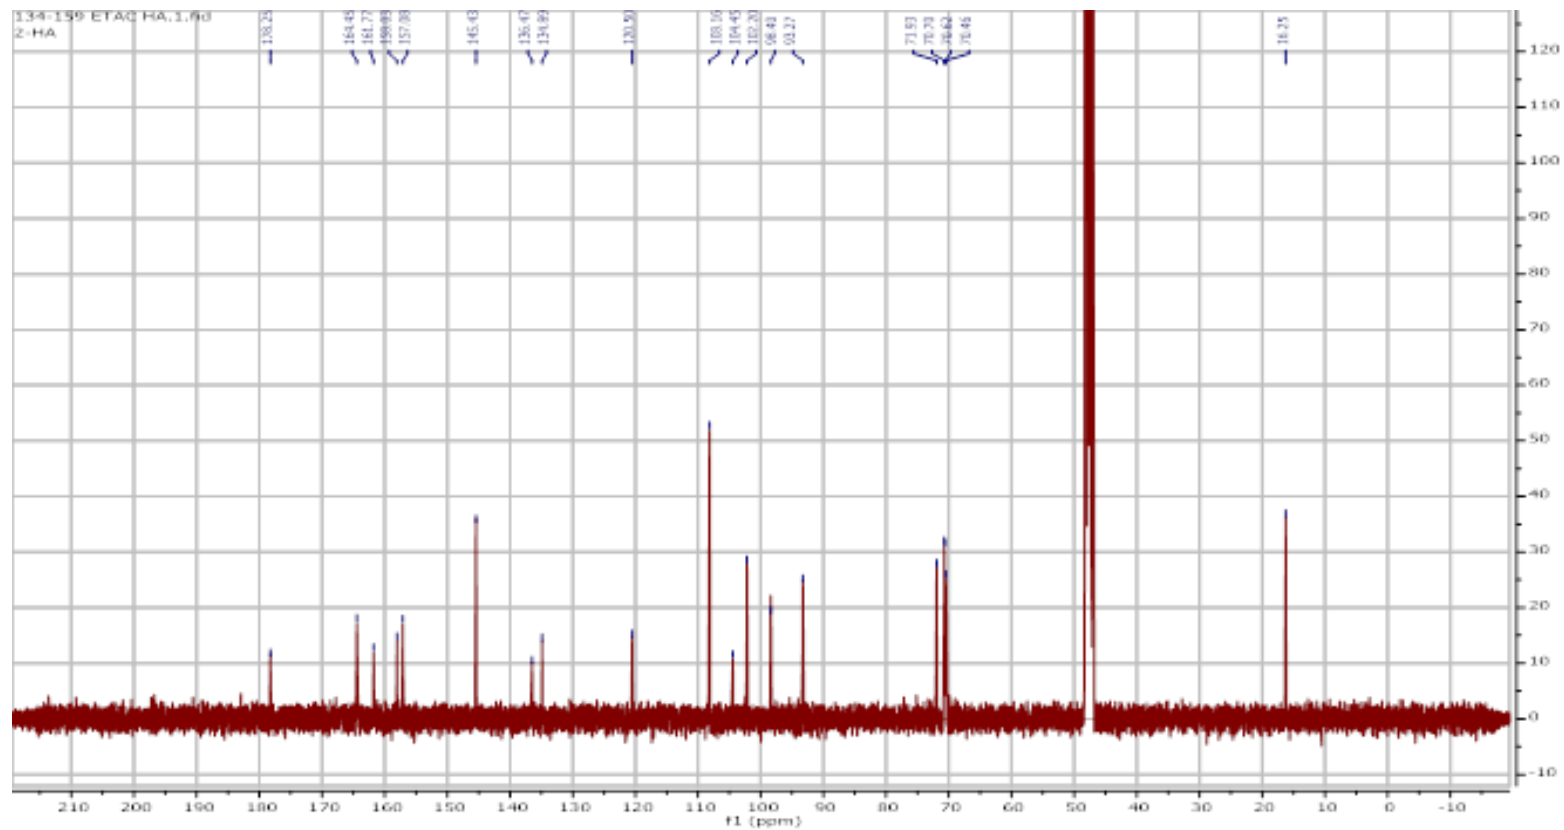

Figure S5.  $^{13}\text{C}$  NMR spectrum of compound 2 (Methanol- $d_4$ , 100 MHz)

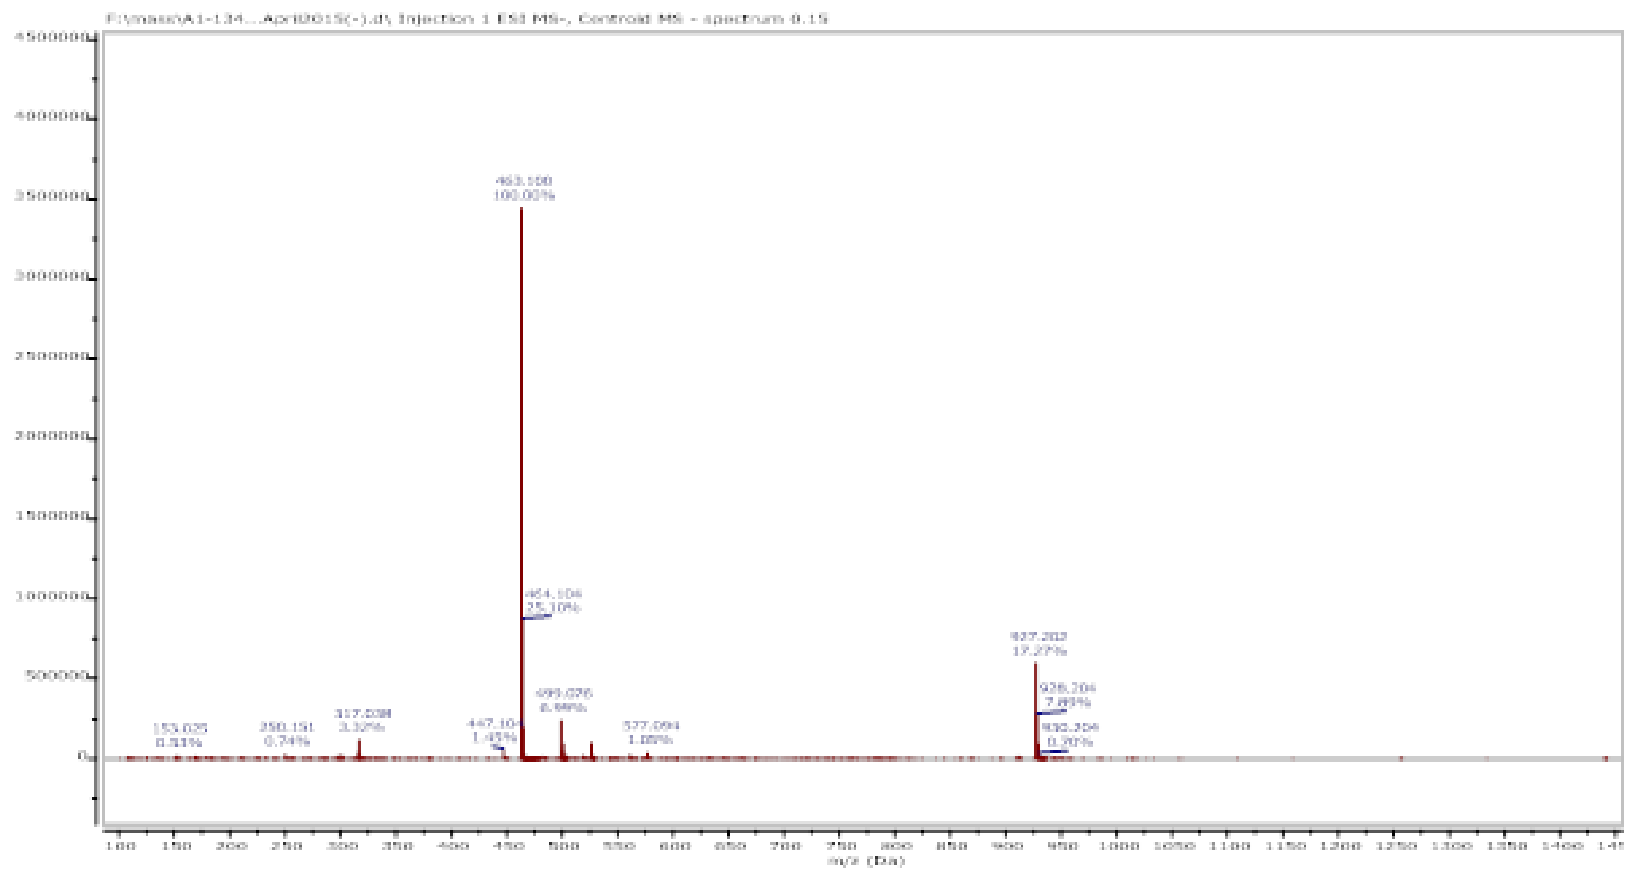

Figure S6. Negative HRESIMS of compound 2



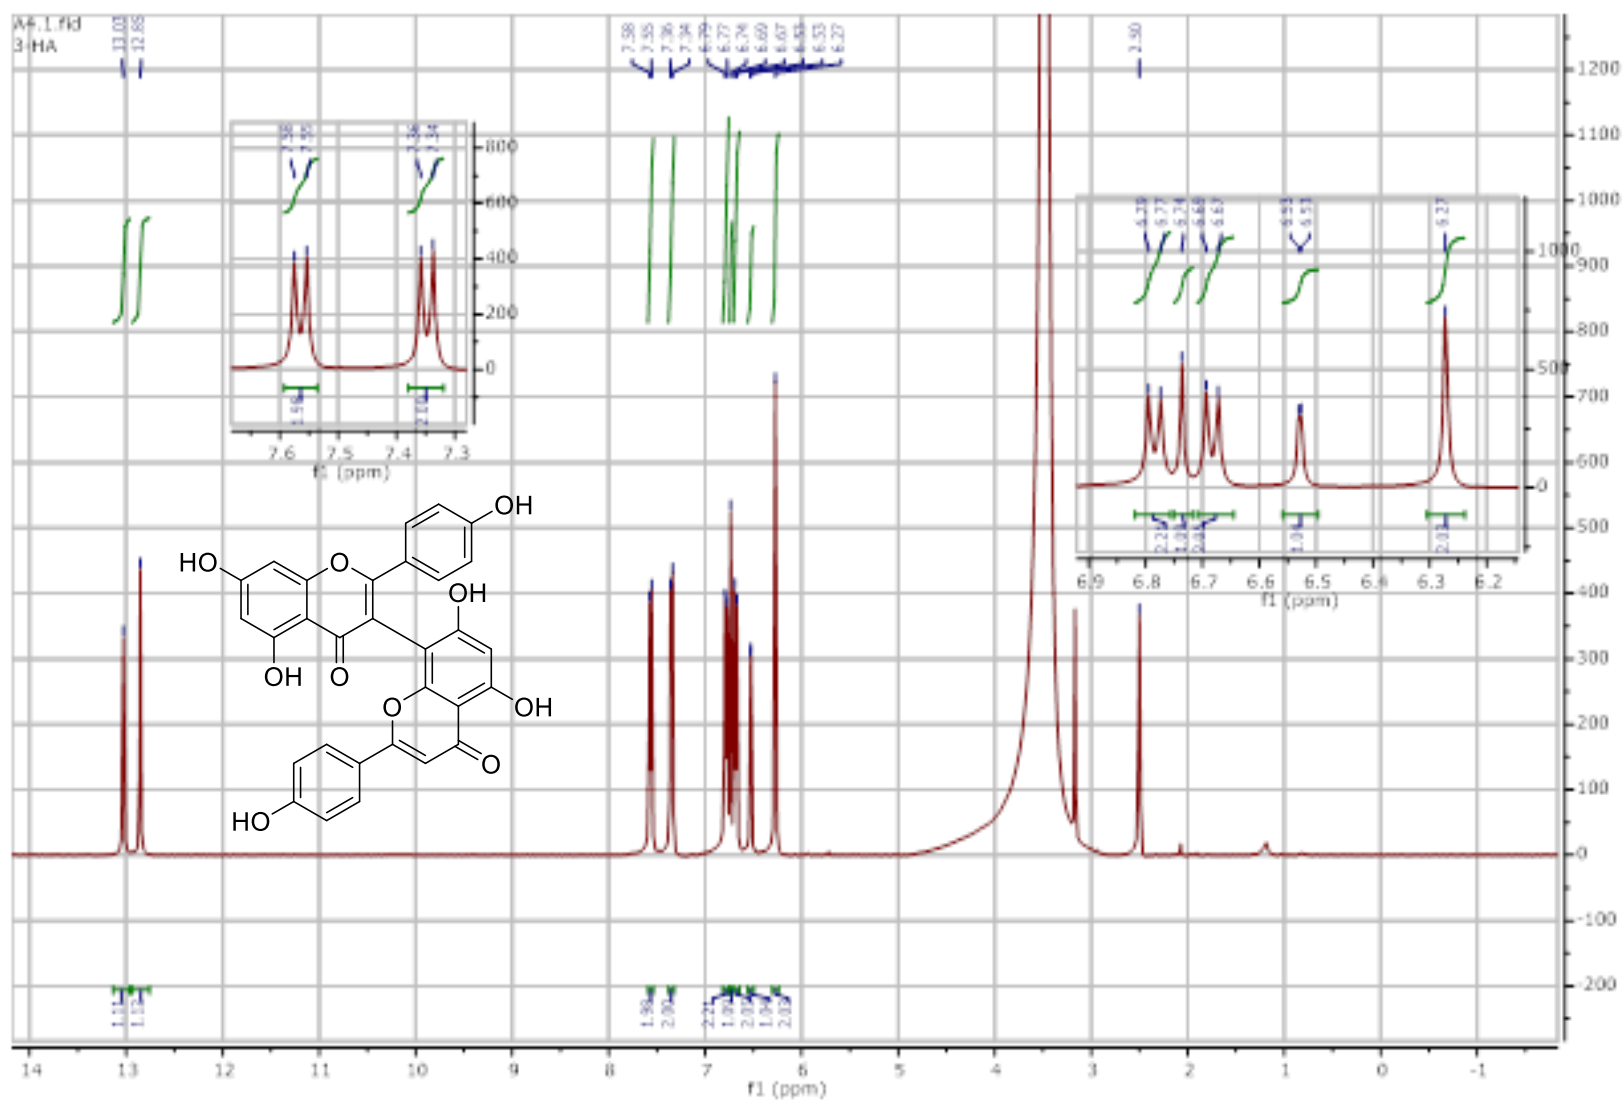

Figure S7. <sup>1</sup>H NMR spectrum of compound 3 (DMSO-*d*<sub>6</sub>, 400 MHz)

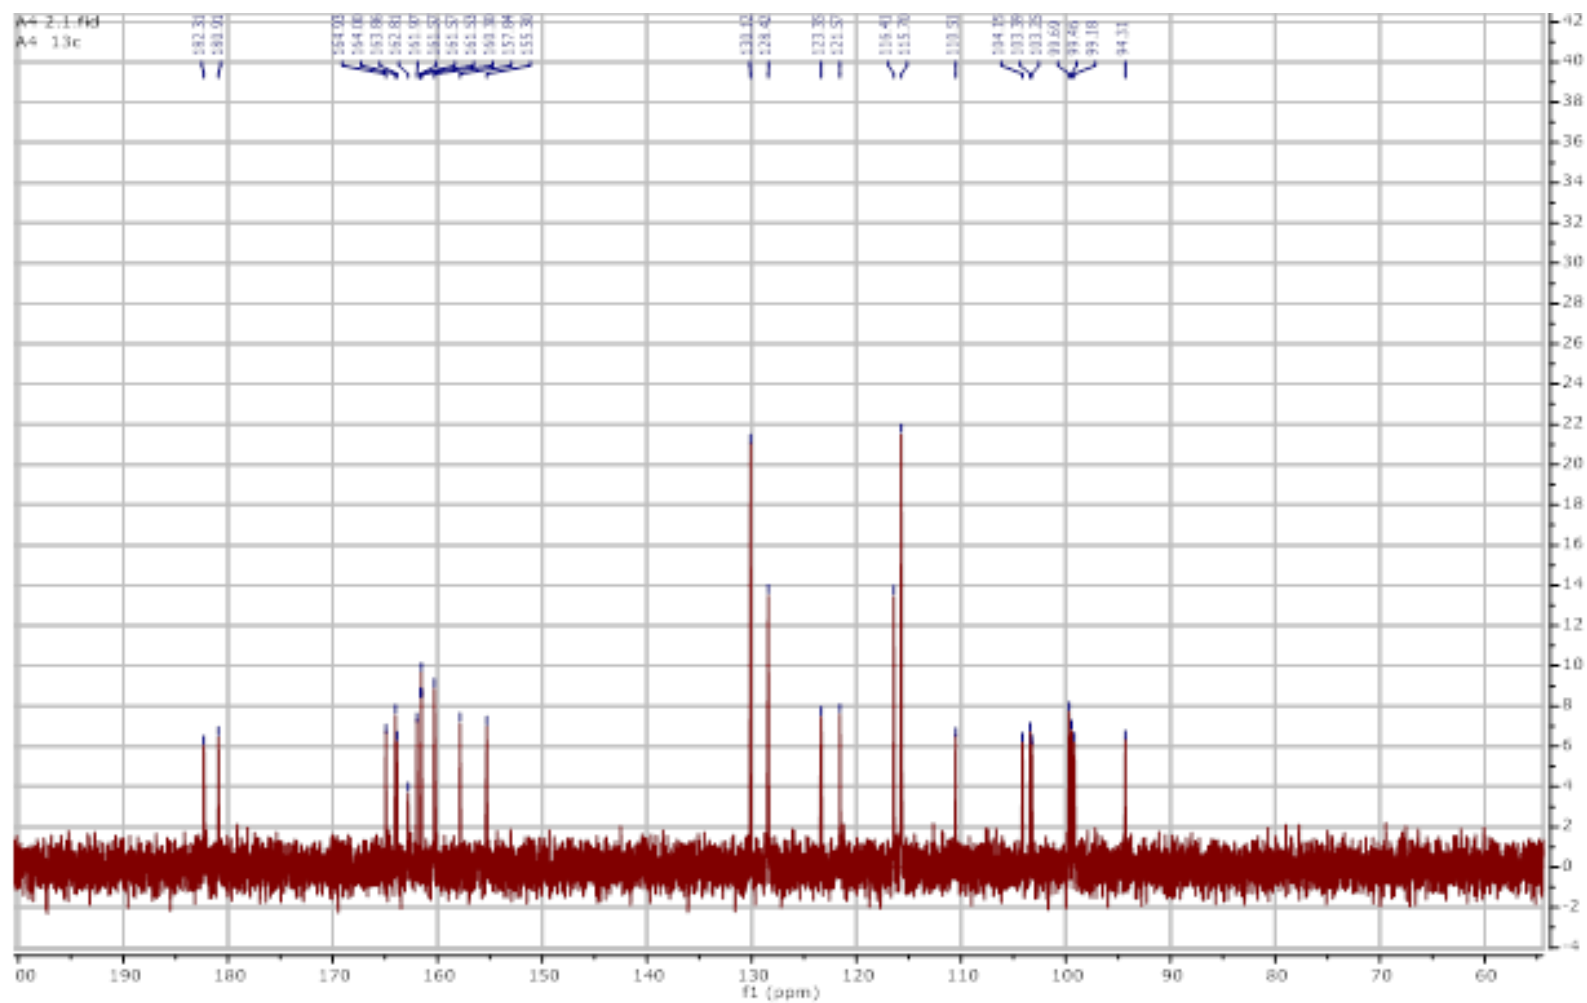

Figure S8.  $^{13}\text{C}$  NMR spectrum of compound 3 (DMSO- $d_6$ , 100 MHz)

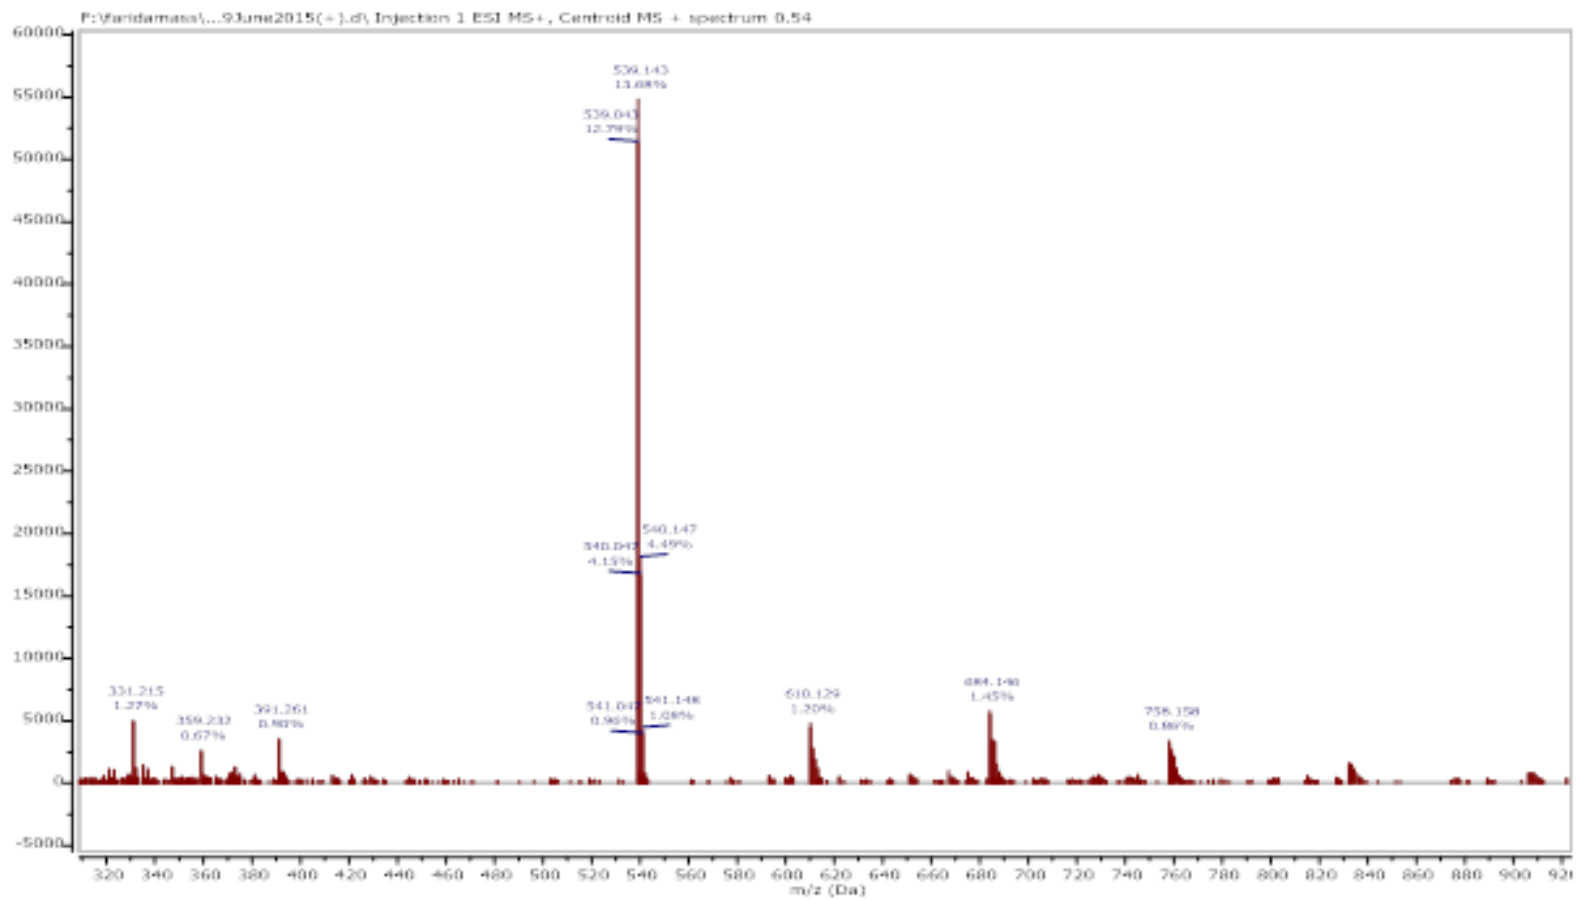

Figure S9. Positive HRESIMS of compound 3

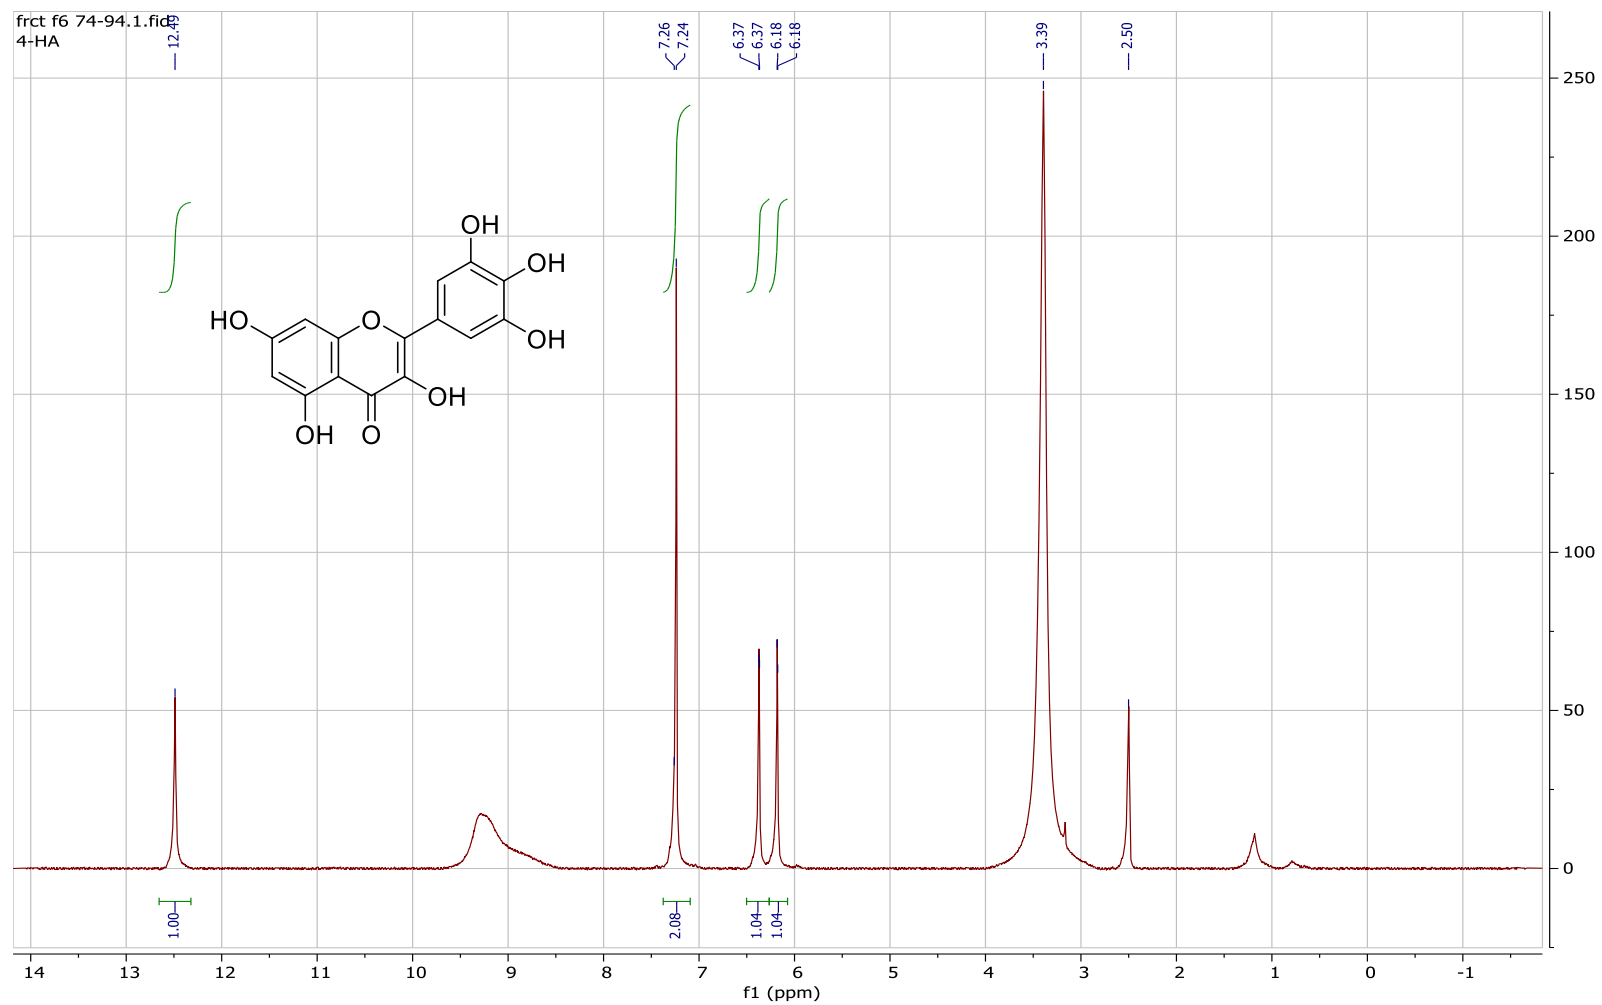

Figure S10.  $^1\text{H}$  NMR spectrum of compound 4 ( $\text{DMSO-}d_6$ , 400 MHz)

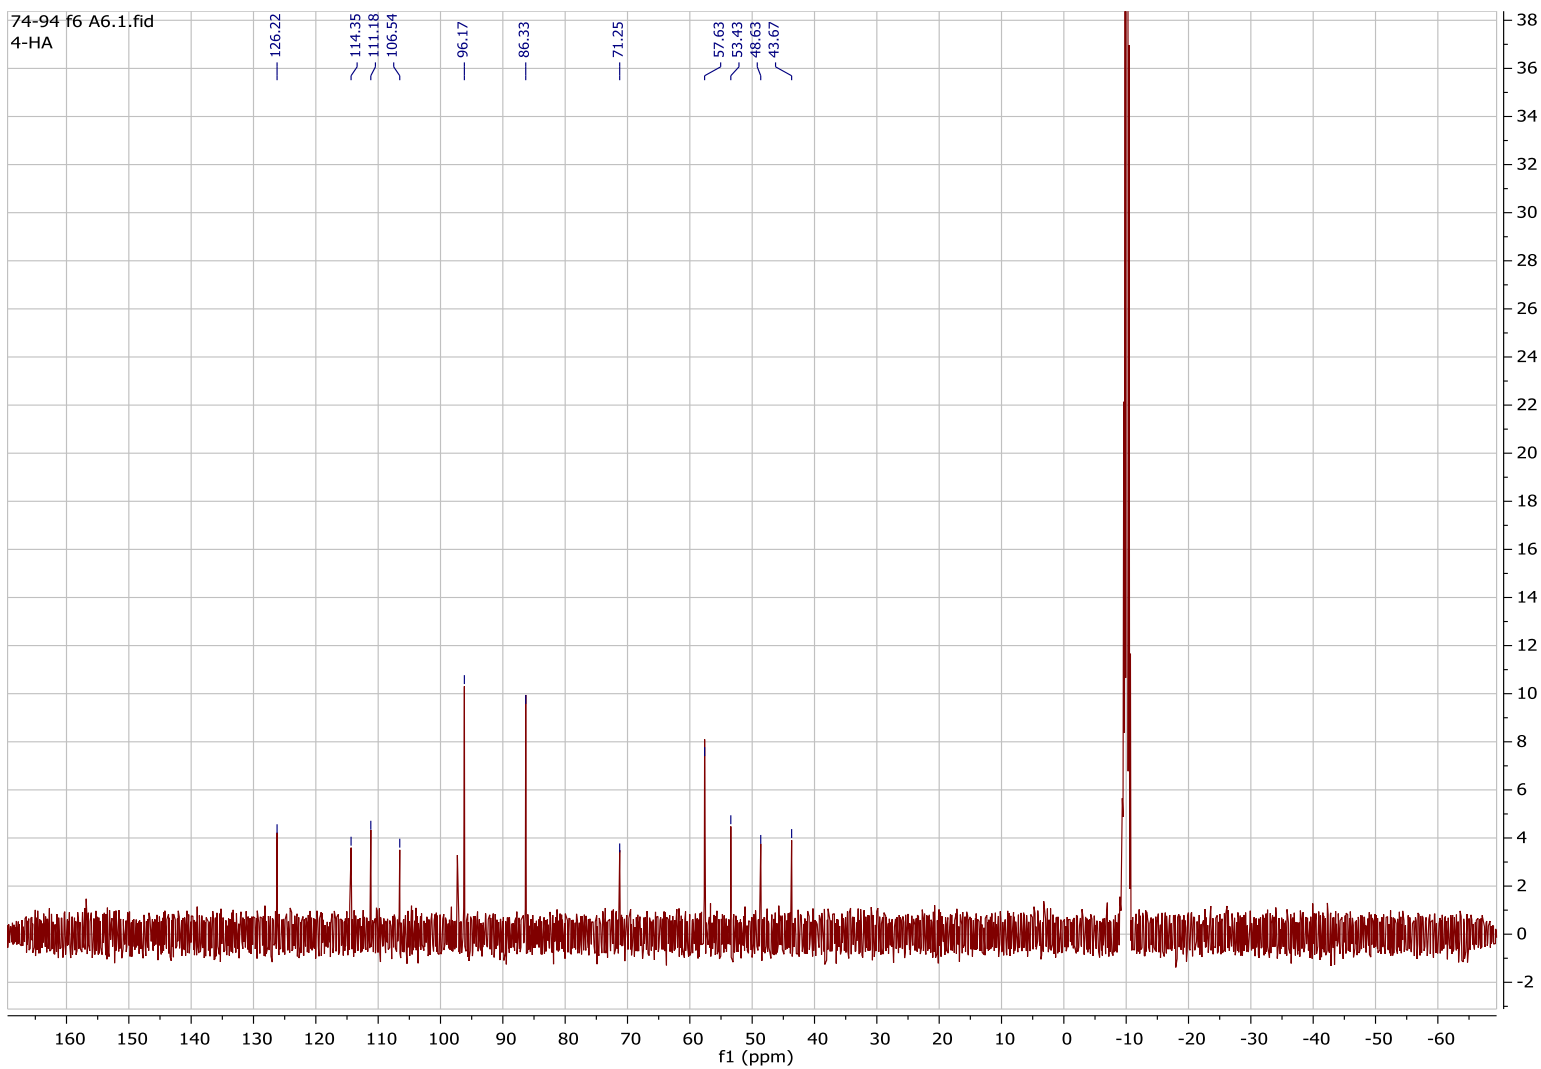

Figure S11.  $^{13}\text{C}$  NMR spectrum of compound 4 (DMSO- $d_6$ , 400 MHz)

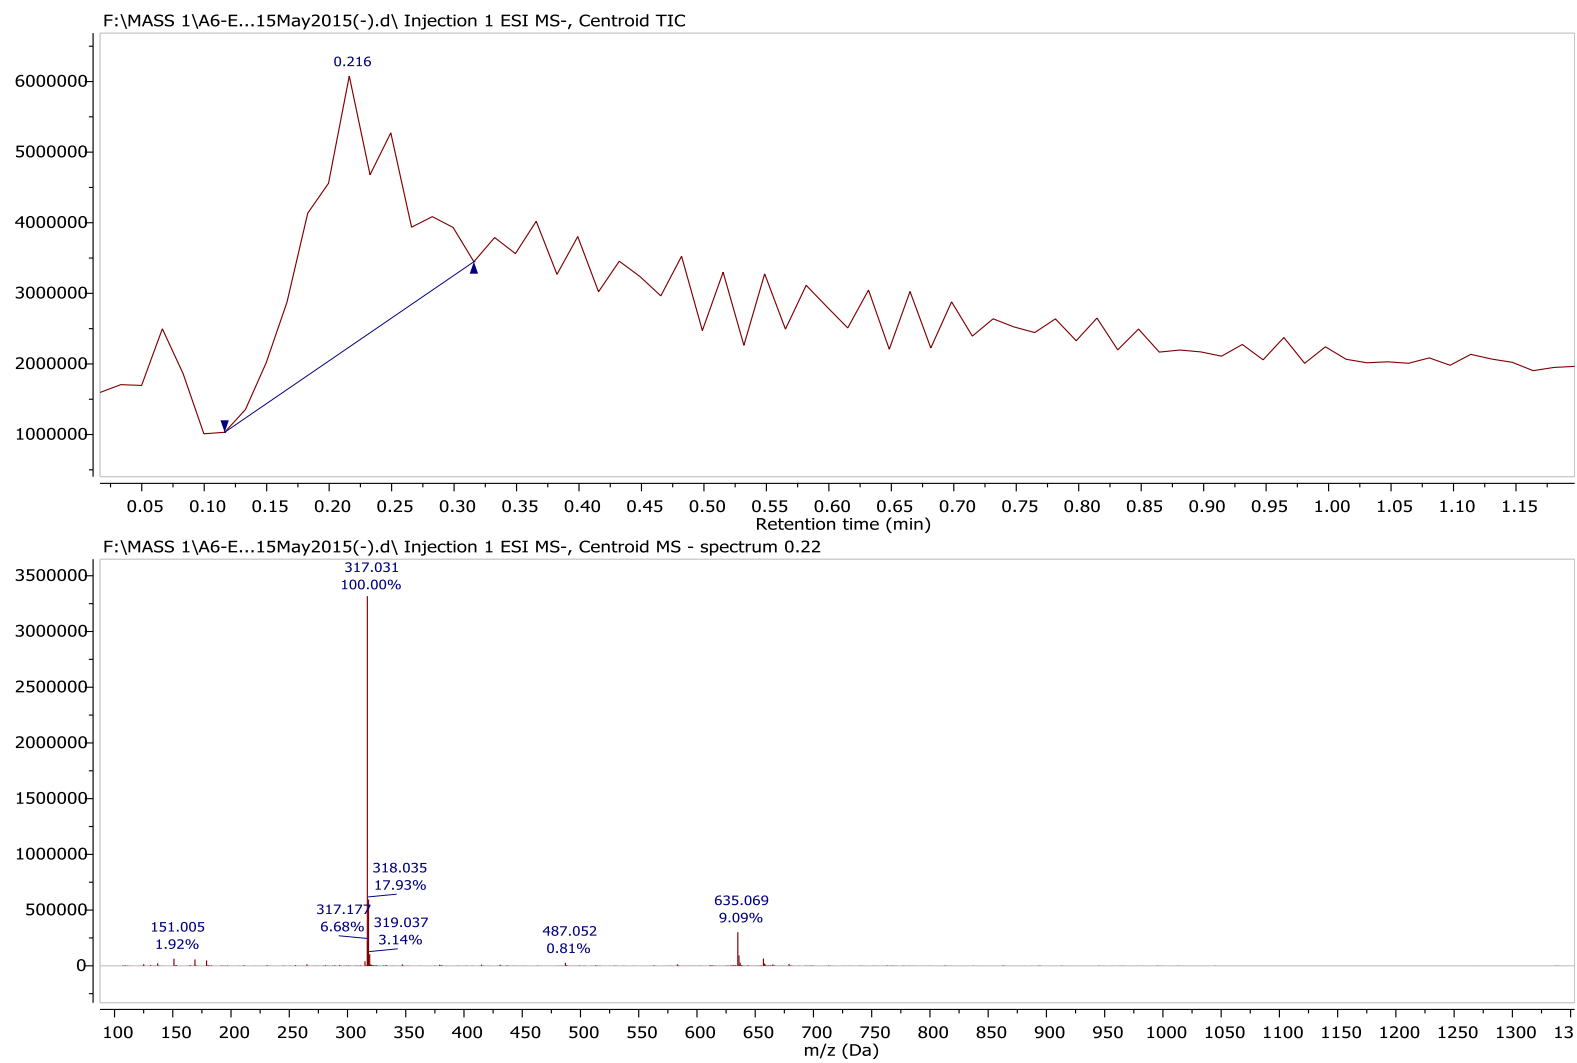

**Figure S12. HRESIMS (-) for compound 4**

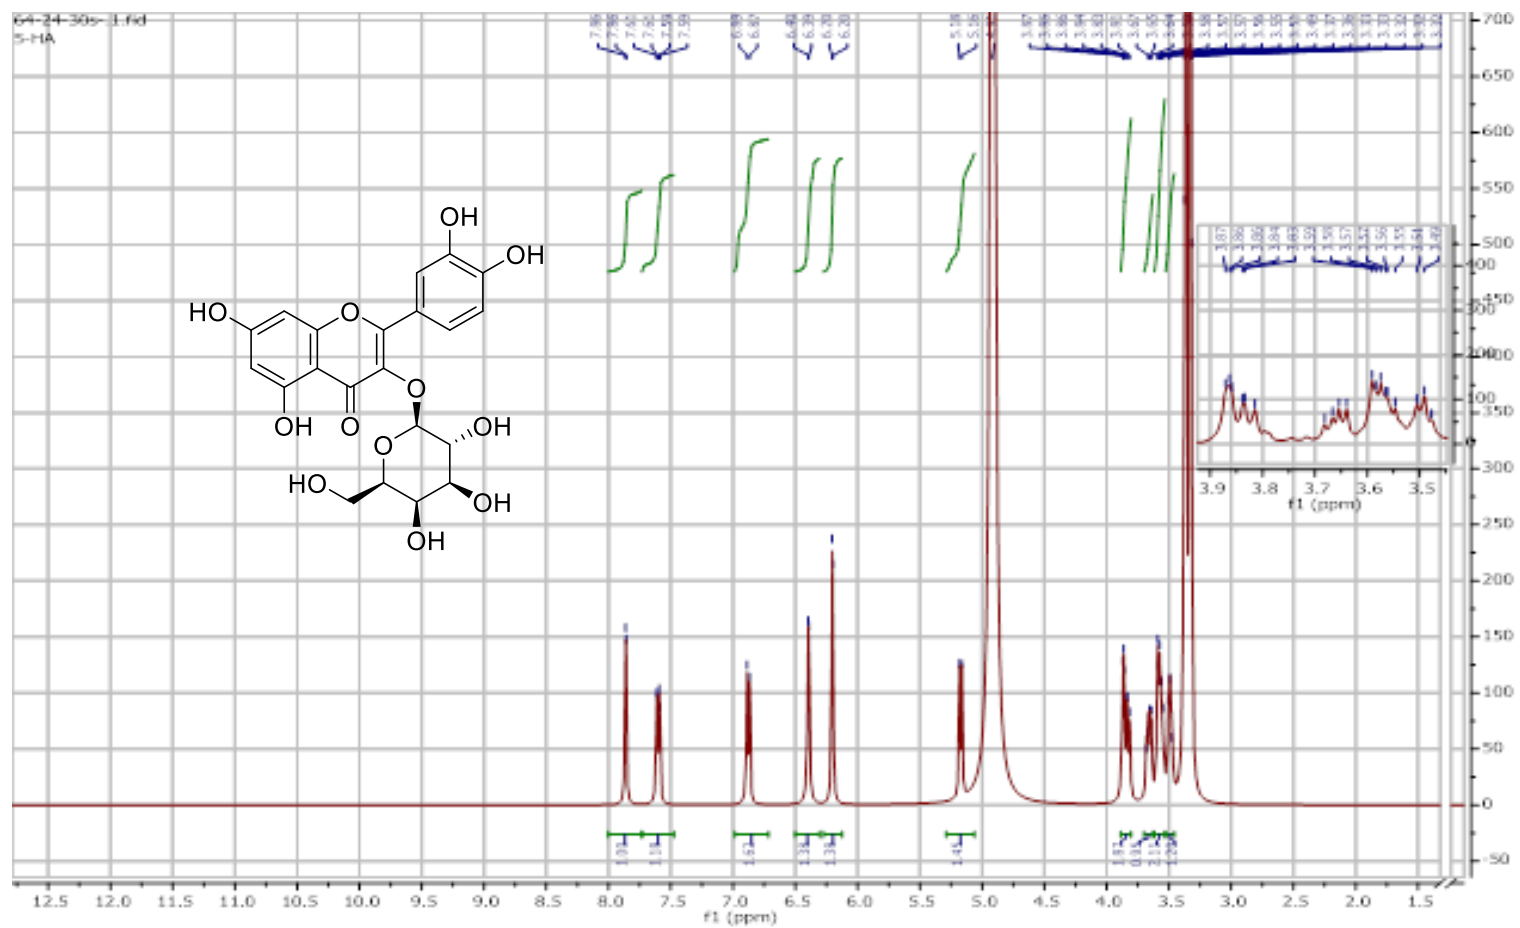

Figure S13. <sup>1</sup>H NMR spectrum of compound 5 (DMSO-*d*<sub>6</sub>, 400 MHz)

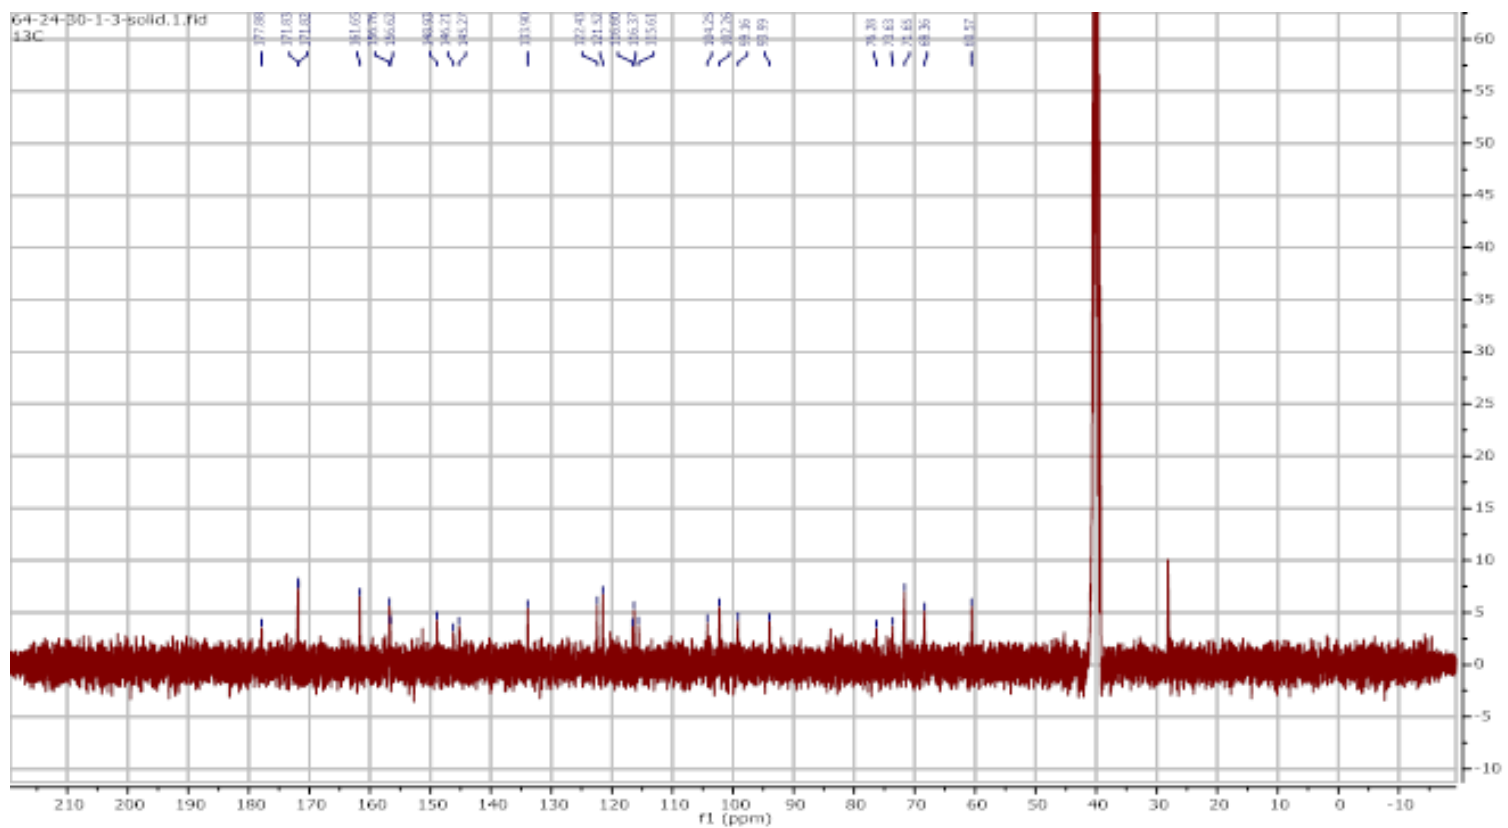

Figure S14.  $^{13}\text{C}$  NMR spectrum of compound 5 (DMSO- $d_6$ , 100 MHz)



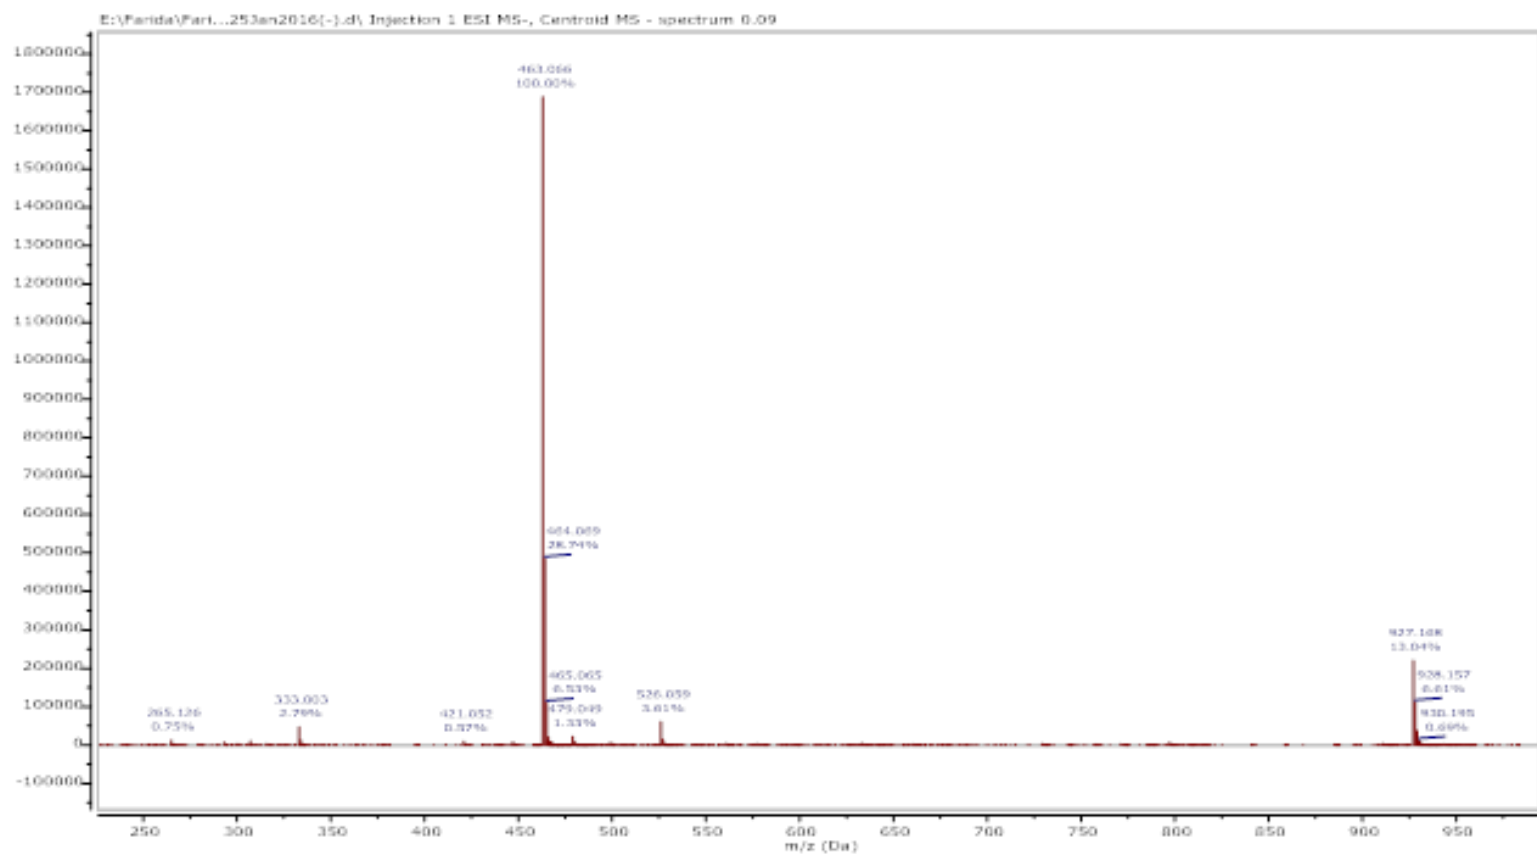

Figure S15. HRESIMS (-) for compound 5

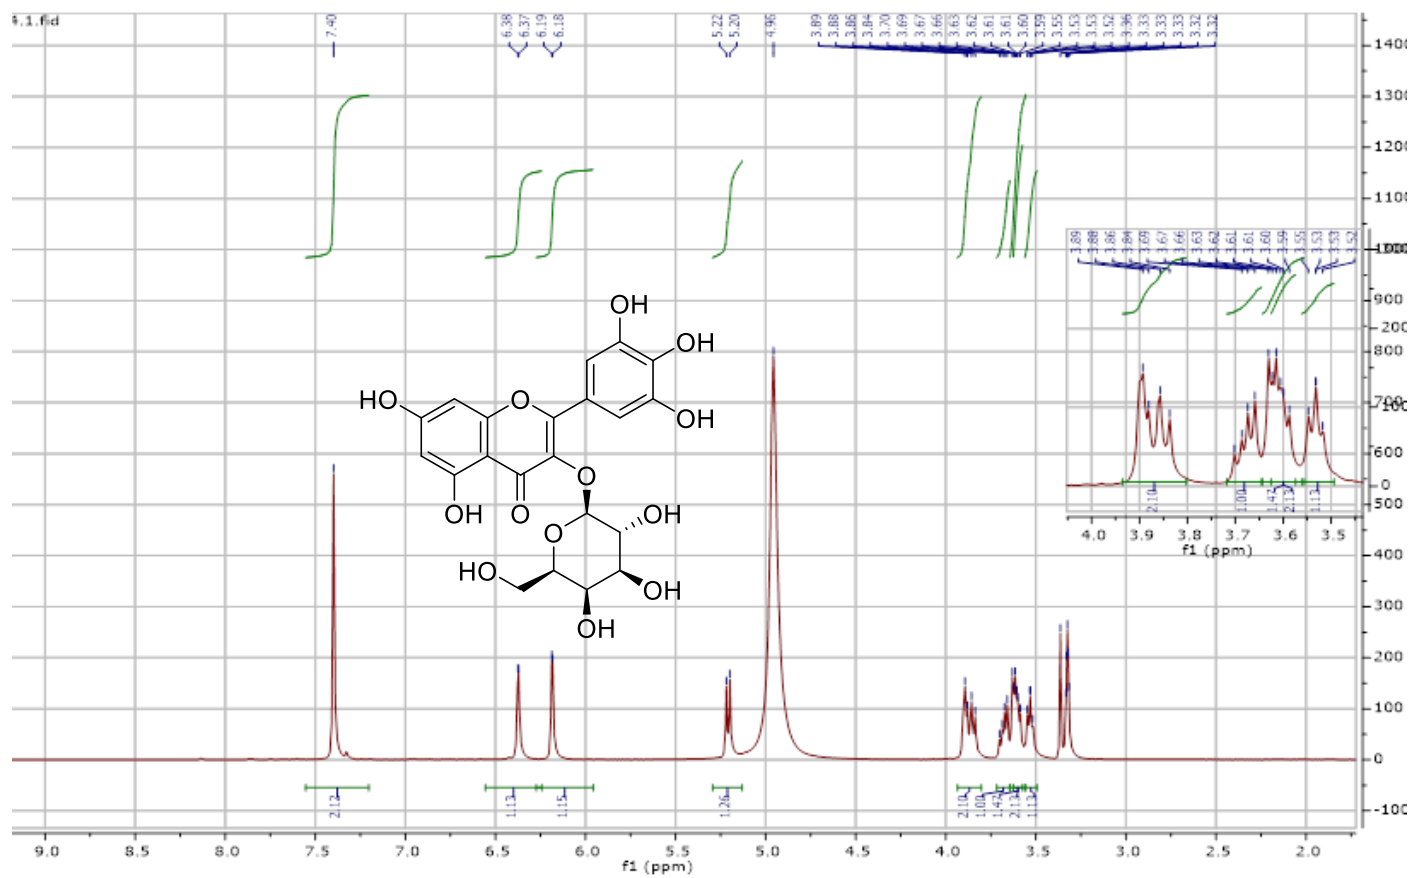

**Figure S16.** <sup>1</sup>H NMR spectrum of compound 6 (Methanol-*d*<sub>4</sub>, 400 MHz)

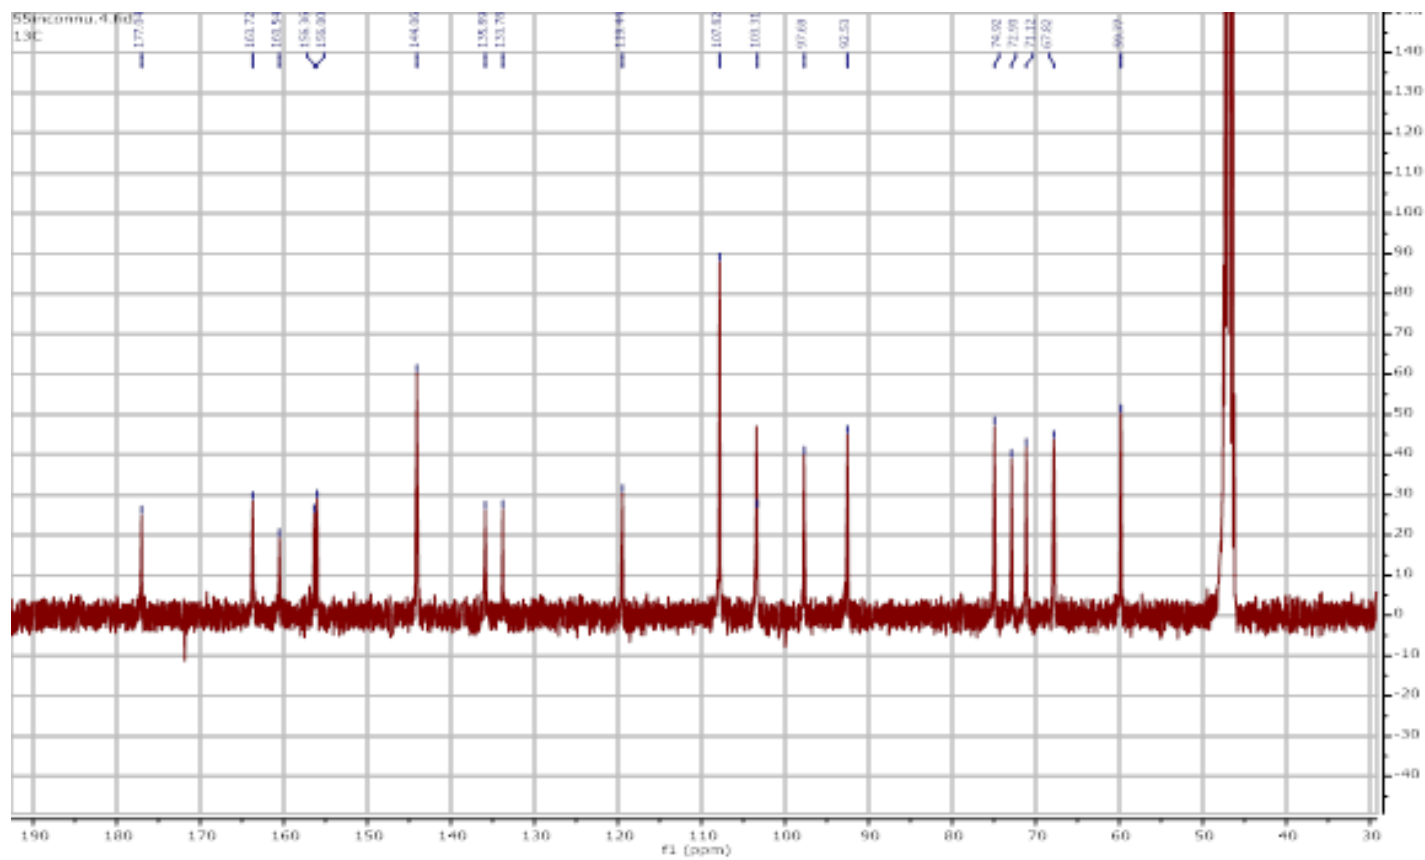

Figure S17.  $^{13}\text{C}$  NMR spectrum of compound 6 (Methanol- $d_4$ , 100 MHz)

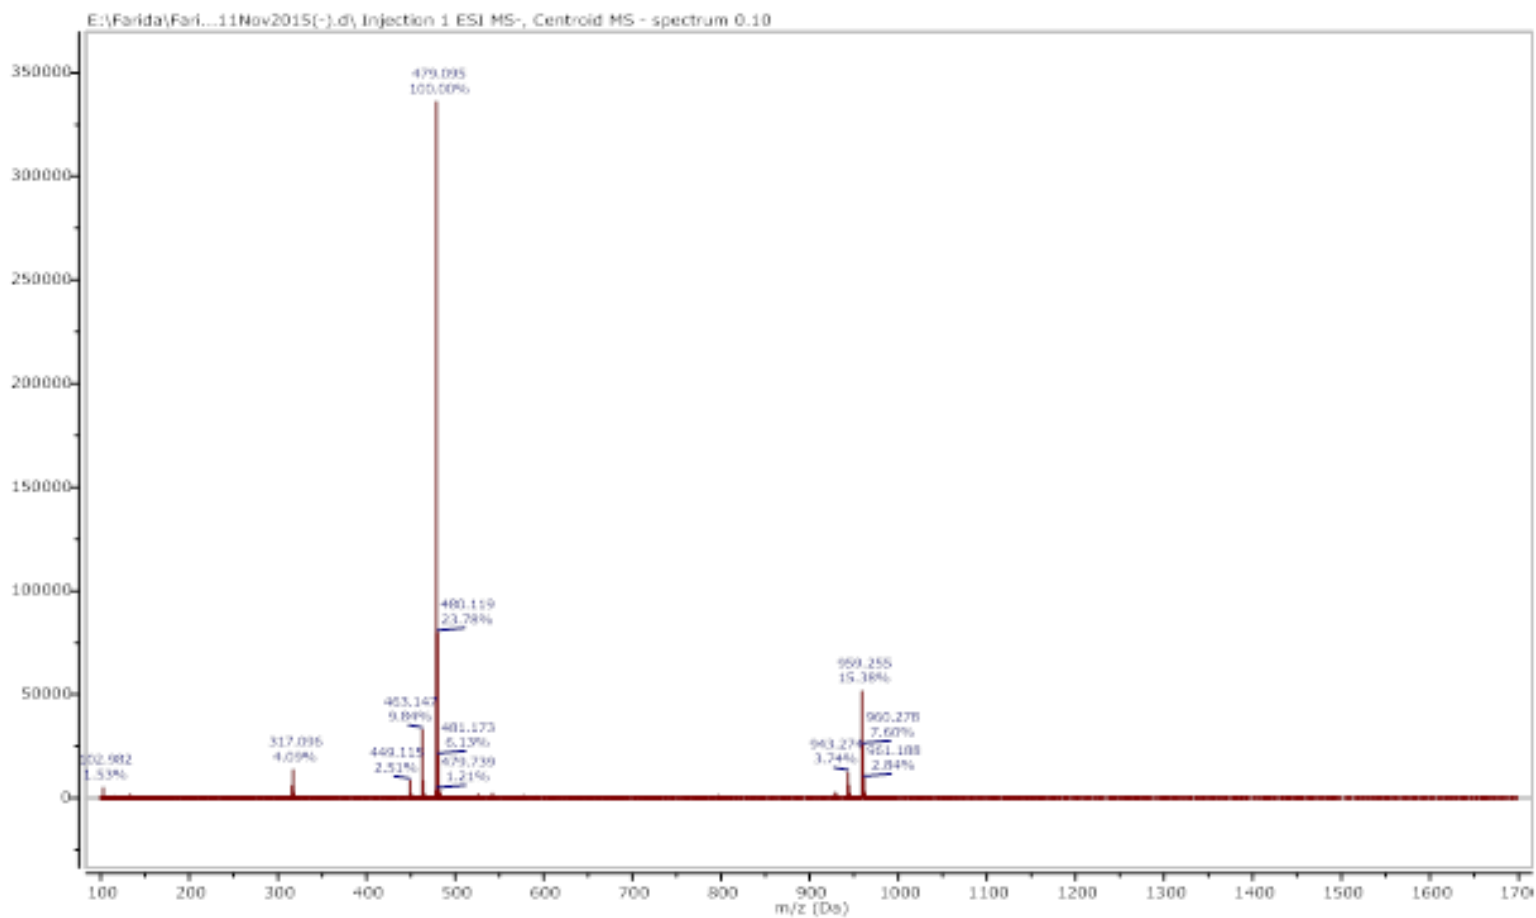

Figure S18. HRESIMS (-) for compound 6

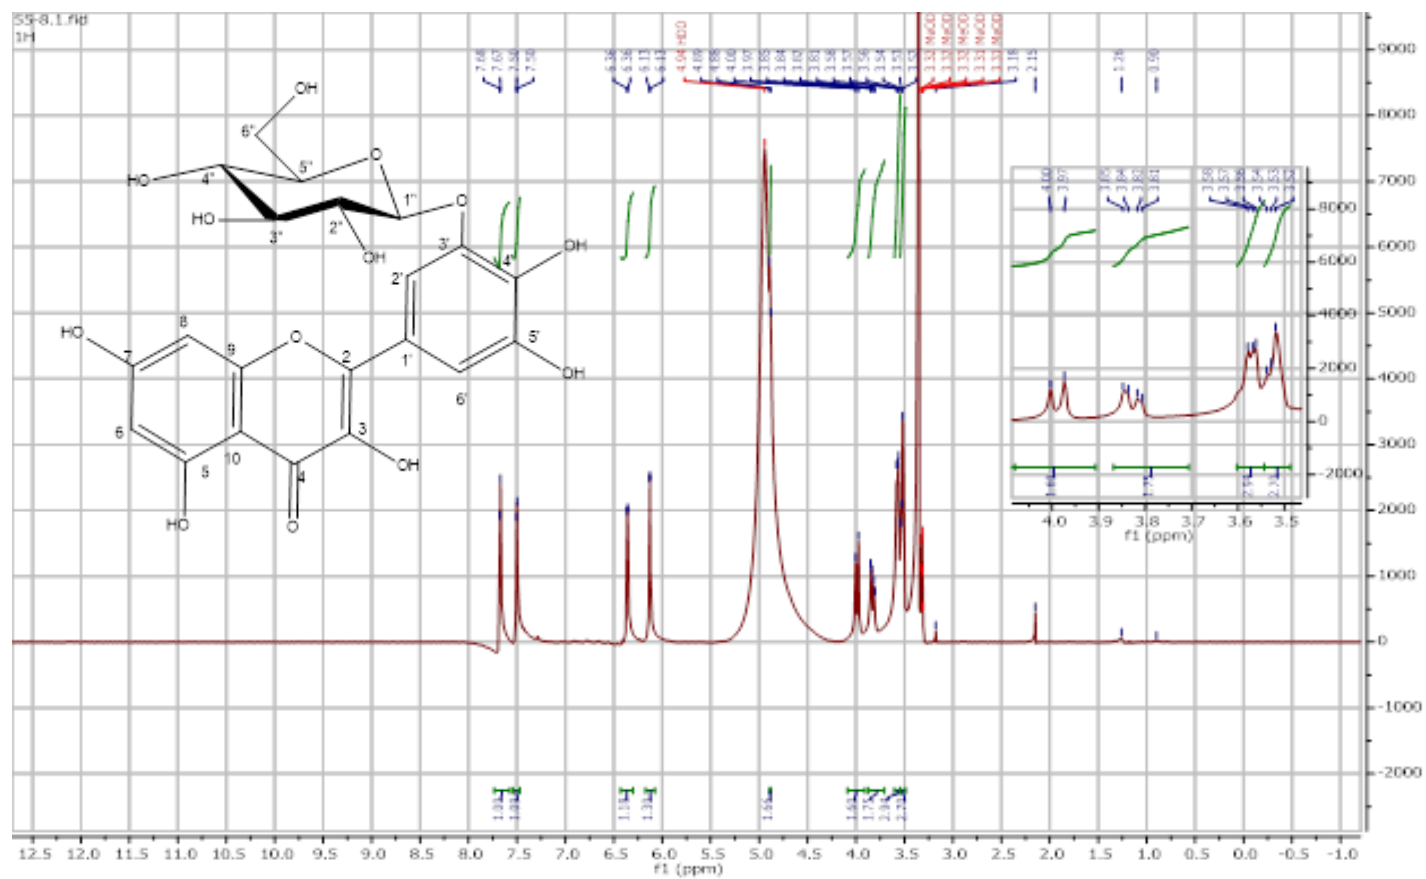

Figure S19.  $^1\text{H}$  NMR spectrum of compound 7 (Methanol- $d_4$ , 400 MHz)

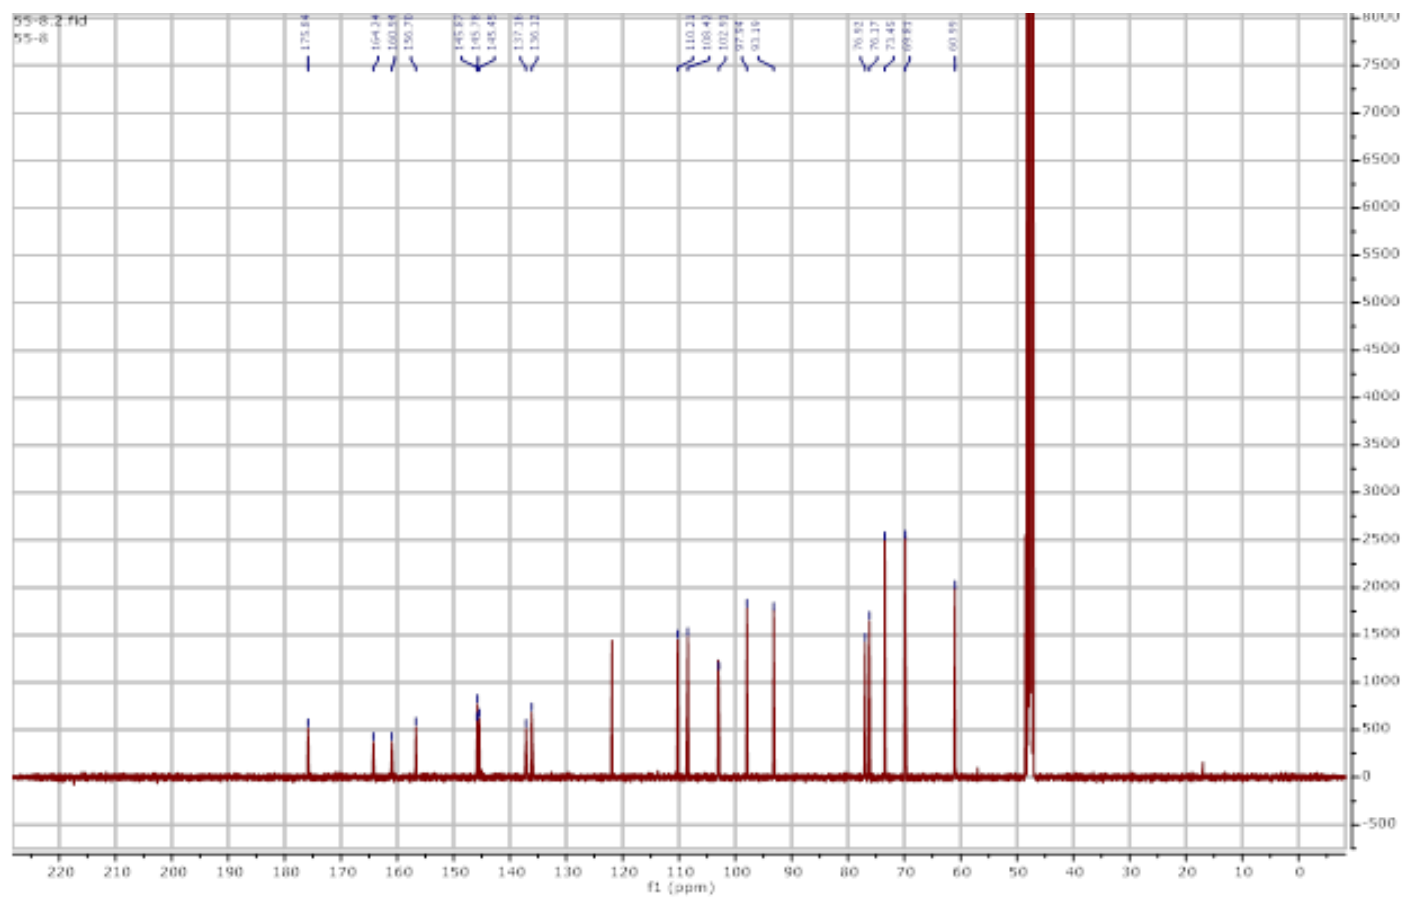

Figure S20.  $^{13}\text{C}$  NMR spectrum of compound 7 (Methanol- $\text{d}_4$ , 100 MHz)

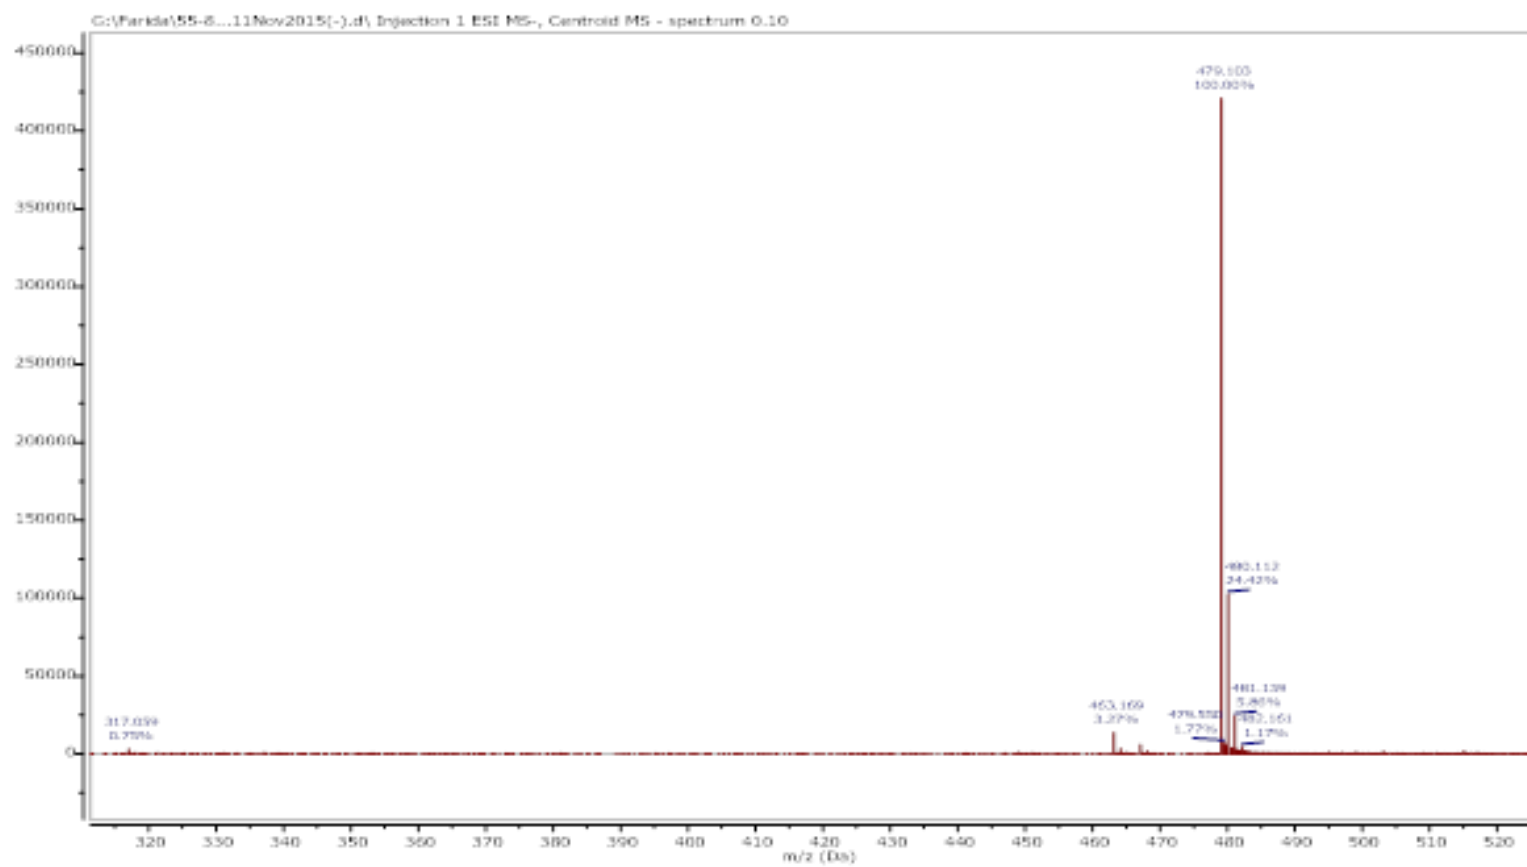

**Figure S21. HRESIMS (-) for compound 7**
